# Supplementary material
Source: Research Square preprint supplement (doi:10.21203/rs.3.rs-9524594/v1)
Supplement: Supplementary file 1 [file 6b25bf8d9b6b87b94e7f1d87.docx]

**Table a: Effect of nutrient management on growth attributes of maize (mean of two years)**

| **Treatment** | **Maize** | | | | | | | | | | |
| --- | --- | --- | --- | --- | --- | --- | --- | --- | --- | --- | --- |
| **Plant height (cm)** | | | **Stem diameter (cm)** | | | | **DMA (g m-2)** | | | |
| **30 DAS** | **60 DAS** | **90 DAS** | | **30 DAS** | **60 DAS** | **90 DAS** | **30 DAS** | **60 DAS** | **90 DAS** |
| **FYM+ 5% J** | 76.7 | 183.6 | 219.6 | | 1.26 | 1.67 | 2.08 | 209.7 | 562.8 | 734.7 |
| **FYM+ 10% J** | 79.7 | 187.5 | 224.0 | | 1.30 | 1.73 | 2.08 | 219.0 | 568.3 | 758.0 |
| **50% N+ FYM+ 5% J** | 111.9 | 248.7 | 266.4 | | 1.67 | 2.10 | 2.39 | 248.0 | 690.7 | 943.3 |
| **50% N+ FYM+ 10% J** | 116.4 | 252.6 | 271.1 | | 1.69 | 2.13 | 2.49 | 255.7 | 702.7 | 960.7 |
| **B+5% J** | 72.2 | 154.9 | 178.4 | | 1.16 | 1.67 | 1.85 | 161.3 | 397.7 | 500.5 |
| **B+10% J** | 74.4 | 161.1 | 189.7 | | 1.19 | 1.72 | 1.90 | 171.3 | 438.2 | 536.5 |
| **100% NPK** | 108.0 | 243.4 | 262.4 | | 1.67 | 2.07 | 2.38 | 242.7 | 680.8 | 935.4 |
| **SEm±** | 2.9 | 5.0 | 5.3 | | 0.05 | 0.05 | 0.05 | 9.5 | 15.4 | 20.8 |
| **LSD (P=0.05)** | 8.3 | 14.6 | 15.5 | | 0.13 | 0.15 | 0.16 | 27.6 | 44.8 | 60.4 |

**Table b: Effect of nutrient management on growth attributes of wheat (mean of two years)**

| **Treatment** | **Wheat** | | | | | | | | | | | | | | |
| --- | --- | --- | --- | --- | --- | --- | --- | --- | --- | --- | --- | --- | --- | --- | --- |
| **Plant height (cm)** | | | | | **Number of tillers (No. m-2)** | | | | | **DMA (g m-2)** | | | | |
| **30 DAS** | **60 DAS** | **90 DAS** | **120 DAS** | **150 DAS** | **30 DAS** | **60 DAS** | **90 DAS** | **120 DAS** | **150 DAS** | **30 DAS** | **60 DAS** | **90 DAS** | **120 DAS** | **150 DAS** |
| **T1** | 11.3 | 19.43 | 30.57 | 72.37 | 87.00 | 167.45 | 273.33 | 265.42 | 256.25 | 248.33 | 13.25 | 81.85 | 350.83 | 698.67 | 798.98 |
| **T2** | 13.47 | 21.63 | 33.63 | 75.10 | 89.83 | 178.58 | 286.67 | 279.58 | 269.17 | 260.92 | 14.72 | 84.30 | 361.83 | 721.50 | 831.07 |
| **T3** | 16.20 | 24.83 | 42.13 | 95.30 | 115.50 | 203.33 | 305.83 | 299.17 | 290.83 | 285.00 | 19.02 | 102.80 | 459.25 | 895.00 | 1068.40 |
| **T4** | 17.40 | 26.13 | 44.62 | 98.40 | 119.22 | 209.17 | 311.67 | 306.67 | 296.67 | 290.42 | 19.93 | 108.33 | 468.27 | 919.33 | 1085.83 |
| **T5** | 10.32 | 15.40 | 28.20 | 62.90 | 78.02 | 152.08 | 223.75 | 222.55 | 212.42 | 205.42 | 9.47 | 42.58 | 224.00 | 480.50 | 602.05 |
| **T6** | 10.67 | 15.60 | 30.10 | 68.05 | 83.28 | 157.08 | 232.50 | 225.42 | 215.00 | 209.17 | 11.12 | 49.48 | 234.50 | 507.17 | 628.68 |
| **T7** | 16.08 | 24.57 | 40.35 | 92.33 | 112.42 | 199.17 | 301.58 | 297.92 | 288.33 | 280.83 | 18.23 | 100.10 | 441.00 | 879.33 | 1030.00 |
| **SEm±** | 0.57 | 0.88 | 1.66 | 2.83 | 3.17 | 3.18 | 6.76 | 6.51 | 6.19 | 5.88 | 0.85 | 2.20 | 7.32 | 11.57 | 15.66 |
| **LSD (P=0.05)** | 1.64 | 2.55 | 4.83 | 8.23 | 9.22 | 9.25 | 19.65 | 18.92 | 18.00 | 17.10 | 2.46 | 6.38 | 21.30 | 33.64 | 45.54 |

**Table c. Percent proportion of energy of various inputs in total energy input in maize cultivation (mean of two years)**

| **Treatment** | **Beejamrit** | **Machinery** | **Diesel** | **FYM** | **Jeevamrit** | **Mandays** | **Seed** | **Nitrogen** | **Phosphorus** | **Potassium** |
| --- | --- | --- | --- | --- | --- | --- | --- | --- | --- | --- |
| **T1** | 0.0 | 6.5 | 30.5 | 42.6 | 0.1 | 16.0 | 4.2 | 0.0 | 0.0 | 0.0 |
| **T2** | 0.0 | 6.5 | 30.5 | 42.5 | 0.3 | 16.0 | 4.2 | 0.0 | 0.0 | 0.0 |
| **T3** | 0.0 | 3.9 | 18.3 | 25.5 | 0.1 | 10.8 | 2.5 | 30.9 | 5.7 | 2.3 |
| **T4** | 0.0 | 3.9 | 18.3 | 25.5 | 0.2 | 10.8 | 2.5 | 30.9 | 5.7 | 2.3 |
| **T5** | 0.0 | 12.0 | 56.0 | 0.0 | 0.3 | 24.1 | 7.7 | 0.0 | 0.0 | 0.0 |
| **T6** | 0.0 | 12.0 | 55.8 | 0.0 | 0.5 | 24.0 | 7.6 | 0.0 | 0.0 | 0.0 |
| **T7** | 0.0 | 3.8 | 17.8 | 0.0 | 0.0 | 8.2 | 2.4 | 60.1 | 5.5 | 2.2 |

**Table d. Percent proportion of energy of various inputs in total energy input in wheat cultivation (mean of two years)**

| **Treatment** | **Beejamrit** | **Machinery** | **Diesel** | **FYM** | **Jeevamrit** | **Mandays** | **Seed** | **Nitrogen** | **Phosphorus** | **Potassium** |
| --- | --- | --- | --- | --- | --- | --- | --- | --- | --- | --- |
| **T1** | 0.0 | 5.5 | 26.0 | 35.4 | 0.1 | 15.6 | 17.3 | 0.0 | 0.0 | 0.0 |
| **T2** | 0.0 | 5.5 | 25.9 | 35.4 | 0.2 | 15.6 | 17.3 | 0.0 | 0.0 | 0.0 |
| **T3** | 0.0 | 3.6 | 16.7 | 22.8 | 0.1 | 10.9 | 11.2 | 27.6 | 5.1 | 2.0 |
| **T4** | 0.0 | 3.6 | 16.7 | 22.8 | 0.2 | 10.9 | 11.2 | 27.6 | 5.1 | 2.0 |
| **T5** | 0.0 | 8.9 | 42.0 | 0.0 | 0.2 | 20.8 | 28.1 | 0.0 | 0.0 | 0.0 |
| **T6** | 0.0 | 8.9 | 41.9 | 0.0 | 0.4 | 20.8 | 28.0 | 0.0 | 0.0 | 0.0 |
| **T7** | 0.0 | 3.5 | 16.3 | 0.0 | 0.0 | 8.3 | 10.9 | 54.0 | 4.9 | 2.0 |

**Table e. Carbon input (kg CE) under different components of maize cultivation (mean of two years)**

| **Treatments** | **Man Days** | **Seed** | **Diesel** | **Nitrogen** | **Phosphorus** | **Potassium** | **FYM** | **N2O** | **Machinery** | **Total carbon footprints input (kg CE)** |
| --- | --- | --- | --- | --- | --- | --- | --- | --- | --- | --- |
| **T1** | 133 | 6 | 35 | 0 | 0 | 0 | 70 | 0 | 0.38 | 244 |
| **T2** | 133 | 6 | 35 | 0 | 0 | 0 | 70 | 0 | 0.38 | 244 |
| **T3** | 149 | 6 | 35 | 78 | 0 | 0 | 70 | 250 | 0.41 | 589 |
| **T4** | 149 | 6 | 35 | 78 | 0 | 0 | 70 | 250 | 0.41 | 589 |
| **T5** | 109 | 6 | 35 | 0 | 0 | 0 | 0 | 0 | 0.36 | 151 |
| **T6** | 109 | 6 | 35 | 0 | 0 | 0 | 0 | 0 | 0.36 | 151 |
| **T7** | 117 | 6 | 35 | 156 | 9 | 5 | 0 | 500 | 0.41 | 828 |
| **Total** | 898 | 45 | 245 | 312 | 9 | 5 | 280 | 1000 | 3 | 2796 |

**Table f. percent proportion of carbon input (kg CE) under different components of maize cultivation (mean of two years)**

| **Treatments** | **Man Days** | **Seed** | **Diesel** | **Nitrogen** | **Phosphorus** | **Potassium** | **FYM** | **N2O** | **Machinery** | **Total** |
| --- | --- | --- | --- | --- | --- | --- | --- | --- | --- | --- |
| **T1** | 54.3 | 2.6 | 14.3 | 0.0 | 0.0 | 0.0 | 28.6 | 0.0 | 0.2 | 100.0 |
| **T2** | 54.3 | 2.6 | 14.3 | 0.0 | 0.0 | 0.0 | 28.6 | 0.0 | 0.2 | 100.0 |
| **T3** | 25.3 | 1.1 | 6.0 | 13.2 | 0.0 | 0.0 | 11.9 | 42.4 | 0.1 | 100.0 |
| **T4** | 25.3 | 1.1 | 6.0 | 13.2 | 0.0 | 0.0 | 11.9 | 42.4 | 0.1 | 100.0 |
| **T5** | 72.2 | 4.3 | 23.3 | 0.0 | 0.0 | 0.0 | 0.0 | 0.0 | 0.2 | 100.0 |
| **T6** | 72.2 | 4.3 | 23.3 | 0.0 | 0.0 | 0.0 | 0.0 | 0.0 | 0.2 | 100.0 |
| **T7** | 14.1 | 0.8 | 4.2 | 18.8 | 1.1 | 0.5 | 0.0 | 60.4 | 0.0 | 100.0 |

**Table g. Carbon input (kg CE) under different components of wheat cultivation (mean of two years)**

| **Treatments** | **Man Days** | **Seed** | **Diesel** | **Nitrogen** | **Phosphorus** | **Potassium** | **FYM** | **N2O** | **Machinery** | **Total carbon footprints input (kg CE)** |
| --- | --- | --- | --- | --- | --- | --- | --- | --- | --- | --- |
| **T1** | 142 | 32 | 37 | 0 | 0 | 0 | 70 | 0 | 1 | 282 |
| **T2** | 142 | 32 | 37 | 0 | 0 | 0 | 70 | 0 | 1 | 282 |
| **T3** | 155 | 32 | 37 | 78 | 0 | 0 | 70 | 250 | 2 | 623 |
| **T4** | 155 | 32 | 37 | 78 | 0 | 0 | 70 | 250 | 2 | 623 |
| **T5** | 114 | 32 | 37 | 0 | 0 | 0 | 0 | 0 | 1 | 184 |
| **T6** | 114 | 32 | 37 | 0 | 0 | 0 | 0 | 0 | 1 | 184 |
| **T7** | 118 | 32 | 37 | 156 | 9 | 5 | 0 | 500 | 2 | 858 |
| **Total** | 939 | 224 | 257 | 312 | 9 | 5 | 280 | 1000 | 10 | 3036 |

**Table h. Percent proportion of carbon input (kg CE) under different components of maize cultivation (mean of two years)**

| **Treatments** | **Man Days** | **Seed** | **Diesel** | **Nitrogen** | **Phosphorus** | **Potassium** | **FYM** | **N2O** | **Machinery** | **Total** |
| --- | --- | --- | --- | --- | --- | --- | --- | --- | --- | --- |
| **T1** | 50.3 | 11.4 | 13.0 | 0.0 | 0.0 | 0.0 | 24.8 | 0.0 | 0.5 | 100.0 |
| **T2** | 50.3 | 11.4 | 13.0 | 0.0 | 0.0 | 0.0 | 24.8 | 0.0 | 0.5 | 100.0 |
| **T3** | 24.8 | 5.1 | 5.9 | 12.5 | 0.0 | 0.0 | 11.2 | 40.1 | 0.2 | 100.0 |
| **T4** | 24.8 | 5.1 | 5.9 | 12.5 | 0.0 | 0.0 | 11.2 | 40.1 | 0.2 | 100.0 |
| **T5** | 62.0 | 17.4 | 19.9 | 0.0 | 0.0 | 0.0 | 0.0 | 0.0 | 0.7 | 100.0 |
| **T6** | 62.0 | 17.4 | 19.9 | 0.0 | 0.0 | 0.0 | 0.0 | 0.0 | 0.7 | 100.0 |
| **T7** | 13.7 | 3.7 | 4.3 | 18.2 | 1.0 | 0.5 | 0.0 | 58.3 | 0.2 | 100.0 |

**Table i. Results of factor loading PCA of growth, yield attributes, yield, economics and energy indices of maize and wheat.**

| **Principal components** | | **Maize** | | **Wheat** | | |
| --- | --- | --- | --- | --- | --- | --- |
| **PC 1** | **PC 2** |  | **PC 1** | **PC 2** |
| Initial Eigenvalues | Total | 19.35 | 1.54 |  | 19.13 | 1.51 |
| % of Variance | 87.98 | 7.03 |  | 86.98 | 6.87 |
| Cumulative % | 87.98 | 95.01 |  | 86.98 | 93.85 |
| Rotation Sums  of Squared Loadings | Total | 10.51 | 2.04 |  | 10.31 | 3.04 |
| % of Variance | 68.12 | 21.65 |  | 65.80 | 20.85 |
| Cumulative % | 68.12 | 79.77 |  | 65.80 | 86.65 |
| **Factor Loadingsa** | | | | | | |
| **Eigen vectorsb** | **Principal components** | | | | | |
|  | **PC 1** | **PC 2** |  | **PC 1** | **PC 2** |
| pH | | 0.22496 | 0.07428 | PH | 0.2194 | 0.00401 |
| DMA | | 0.22548 | 0.09426 | NoT | 0.2243 | -0.12498 |
| SD | | 0.22356 | 0.05002 | DMA | 0.22718 | -0.06136 |
| NoC | | 0.21178 | 0.12625 | NET | 0.22433 | -0.14145 |
| CL | | 0.22003 | 0.18759 | NoG | 0.22244 | -0.13074 |
| NGC | | 0.20435 | 0.30725 | SL | 0.21918 | -0.16165 |
| TGW | | 0.20481 | 0.22397 | TGW | 0.1716 | -0.3216 |
| GT | | 0.22431 | 0.10955 | GY | 0.2262 | -0.05481 |
| SY | | 0.22365 | 0.11863 | SY | 0.22664 | -0.04263 |
| GR | | 0.22414 | 0.11243 | GR | 0.22651 | -0.05038 |
| NR | | 0.21777 | -0.13979 | NR | 0.22069 | 0.15036 |
| B:C | | 0.14789 | -0.43502 | B:C | 0.07682 | 0.70302 |
| EUE | | -0.22019 | 0.02446 | EUE | -0.22124 | -0.00664 |
| SE | | 0.22106 | -0.14504 | SE | 0.21875 | 0.10562 |
| EI | | -0.20658 | -0.24045 | EI | -0.20563 | 0.12041 |
| EP | | -0.22056 | 0.04683 | EP | -0.21784 | -0.04764 |
| EER | | -0.21996 | 0.05624 | EER | -0.21682 | -0.02955 |
| TCO | | 0.21525 | 0.24363 | TCO | 0.22465 | -0.11232 |
| NCG | | -0.21514 | 0.245 | NCG | -0.22014 | -0.009 |
| CE | | -0.21514 | 0.245 | CE | -0.21853 | -0.02102 |
| CSI | | 0.19511 | -0.4054 | CSI | 0.19676 | 0.40864 |
| CFs per unit economic output | | 0.19419 | -0.33367 | CFs per unit economic output | 0.209 | 0.223 |
| CFs’ per unit of net return | | 0.22496 | 0.07428 | CFs’ per unit ofnet return | 0.226 | 0.173 |

## **Note:** Extraction Method: Principal Component Analysis; Rotation Method: Varimax with Kaiser Normalization.

aBoldfaced factor loadings are considered highly weighted; bRotation converged in 5 iterations.

**Supplementary Table j. Results of Clustering**

| **Vertical clusters** | **Crop Characteristics** | **Horizontal Clusters** | **Treatments** |
| --- | --- | --- | --- |
| **In maize** | | | |
| Outlier I | Specific energy, | Outlier I | Recommended NPK |
| Outlier II | Benefit cost ratio | Cluster I | B+ 5%J, B+ 10% J |
| Cluster I | Plant height, Grain yield, Straw yield and Gross returns | Cluster II | FYM + 10% J, FYM + 5% J |
| Cluster II | DMA, Stem diameter, Cob length and No. of cobs per plant | Cluster III | 50% N + 10 t ha-1 FYM + 10% J,  50% N + 10 t ha-1 FYM + 5% J |
| Cluster III | No. of grains per cob and Thousand grain weight |  |  |
| Cluster IV | Energy efficiency ratio, Energy use efficiency, Energy productivity |  |  |
| Cluster V | Energy intensity, Carbon efficiency and Carbon sustainability index |  |  |
| **In wheat** | | | |
| Outlier I | Specific energy | Outlier I | Recommended NPK |
| Outlier II | Benefit cost ratio | Cluster I | B+ 5%J, B+ 10% J |
| Cluster I | Plant height and Net return | Cluster II | FYM + 10% J, FYM + 5% J |
| Cluster II | No. of tillers, No. of effective tillers, Dry matter accumulation, Gross returns, Spike length and Straw yield | Cluster III | 50% N + 10 t ha-1 FYM + 10% J,  50% N + 10 t ha-1 FYM + 5% J |
| Cluster III | Thousand grain weight and Grain yield |  |  |
| Cluster IV | Energy use efficiency, Energy productivity and Energy efficiency ratio |  |  |
| Cluster V | Energy intensity, Carbon efficiency and Carbon sustainability index |  |  |
